# Supplementary material for: Divergent acyl carrier protein decouples mitochondrial Fe-S cluster biogenesis from fatty acid synthesis in malaria parasites
Source: eLife. 2021 Oct 6;10:e71636. doi: 10.7554/eLife.71636 (PMC8547962; doi:10.7554/eLife.71636)
Supplement: Figure 4—source data 1. [file elife-71636-fig4-data1.xlsx]

## Sheet: Sheet1
Raw integrated signal intensity values for western blot densitometry analysis in Figure 4E.
	1		2		3
	+aTC	-aTC	+aTC	-aTC	+aTC	-aTC
Nfs1	9257.38	0	5869.65	875.406
Ef1a	1881.22	681.87	3670.23	5537.11
ratio	4.92093	0	1.59926	0.158098
Rieske	1041.16	0	3298.68	0	24587.2	33.364
Ef1a/b	4796.03	2777.06	2012.79	1905.13	20067.8	10018.4
ratio	0.217088	0	1.63886	0	1.22521	0.00333028
HSP60	7468.26	4878.72	6107.41	4799.7
Ef1a	4796.03	2777.06	2012.79	1905.13
ratio	1.55717	1.75679	3.0343	2.51935
Cyt-c1	6797.86	8345.5	5664.91	5149.08
Ef1a	10602	7853.55	13438.8	8910.33
ratio	0.641188	1.06264	0.421533	0.577878
