# Supplementary material for: Divergent acyl carrier protein decouples mitochondrial Fe-S cluster biogenesis from fatty acid synthesis in malaria parasites
Source: eLife. 2021 Oct 6;10:e71636. doi: 10.7554/eLife.71636 (PMC8547962; doi:10.7554/eLife.71636)
Supplement: Figure 5—source data 1. [file elife-71636-fig5-data1.xlsx]

## Sheet: Sheet1
Parasite counts for Figure 5D
Experiment #1					Experiment #2
+aTC	punctate	dispersed	total		+aTC	punctate	dispersed	total
slide 1	6	0	6		slide 6	5	0	5
slide 2	6	1	7		slide 8	4	0	4
slide 3	5	1	6		slide 9	5	0	5
slide 4	4	0	4		slide 10	4	0	4
slide 5	1	0	1		total	18	0	18
total	22	2	24		percent	100	0
percent	91.6667	8.33333
Experiment #1					Experiment #2
+aTC+Prog old	punctate	dispersed	total		+aTC+Prog new	punctate	dispersed	total
initial slides	10	0	10		slide 5	2	0	2
slide 1001	5	0	5		slide 6	0	3	3
slide 1005	3	0	3		slide 21	4	1	5
total	18	0	18		slide 22	1	0	1
percent	100	0			slide 23	4	1	5
					slide 25	3	0	3
					slide 26	2	1	3
					slide 27	6	0	6
					total	22	6	28
					percent	78.5714	21.4286
Experiment #1					Experiment #2
-aTC old	punctate	dispersed	total		-aTC new	punctate	dispersed	total
initial slides	11	4	15		slide 1	6	1	7
slide 1056	4	0	4		slide 4	6	0	6
total	15	4	19		slide 5	3	0	3
percent	78.9474	21.0526			slide 7	3	0	3
					slide 12	3	0	3
					total	21	1	22
					percent	95.4545	4.54545
Experiment #1					Experiment #2
-aTC+Prog old	punctate	dispersed	total		-aTC+Prog new	punctate	dispersed	total
initial slides	1	9	10		slide 3	0	3	3
slide 1014	1	3	4		slide 4	1	5	6
slide 1016	0	3	3		slide 6	1	4	5
slide 1022	1	3	4		slide 7	0	5	5
total	3	18	21		slide 36	1	5	6
percent	14.2857	85.7143			total	3	22	25
					percent	12	88
