# Supplementary material for: Divergent acyl carrier protein decouples mitochondrial Fe-S cluster biogenesis from fatty acid synthesis in malaria parasites
Source: eLife journal article supplement (doi:10.7554/elife.71636), 2021-10-06

Uncropped gel image for Figure 3C

$\Delta 2-50$  mACP (WT or F113A)  
Isd11-His<sub>6</sub> (*E. coli*)

$\alpha$ -HA IP  
Ni-NTA  
 $\alpha$ -HA IP  
Ni-NTA  
 $\alpha$ -HA IP  
Ni-NTA  
F113A  
WT  
F113A

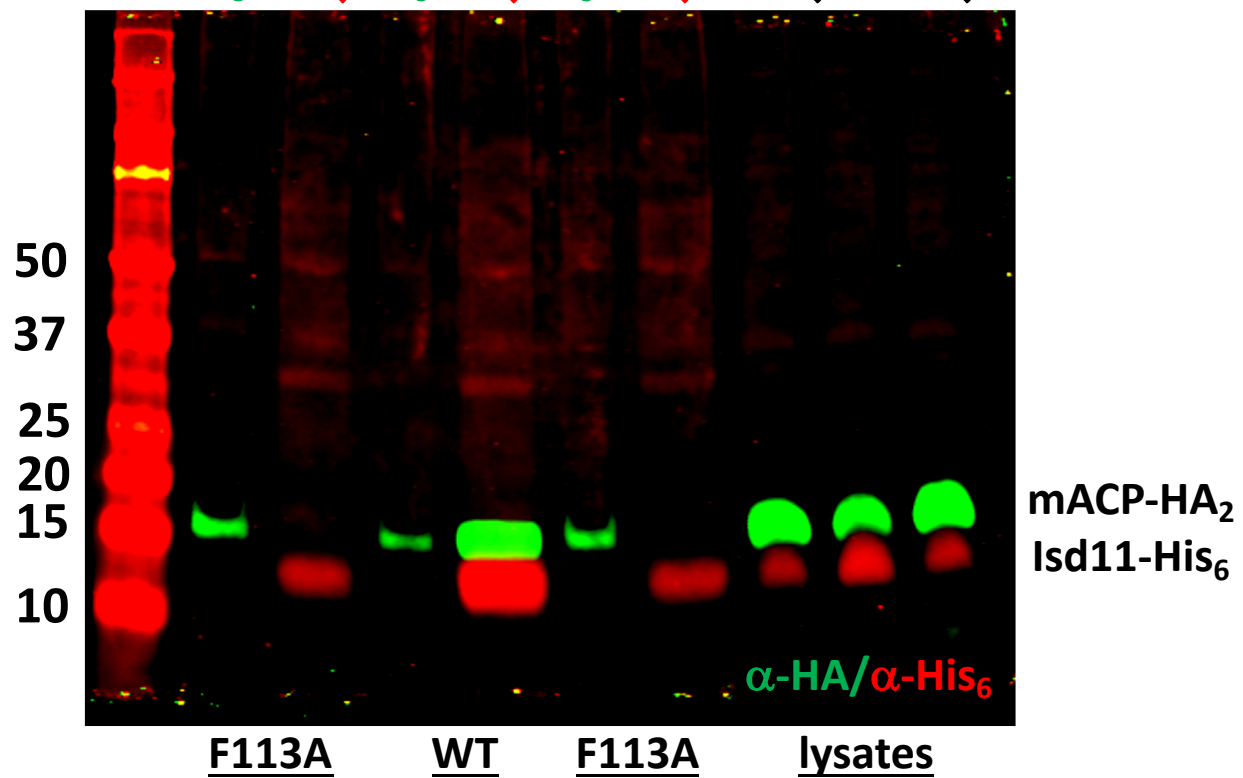

unlabelled

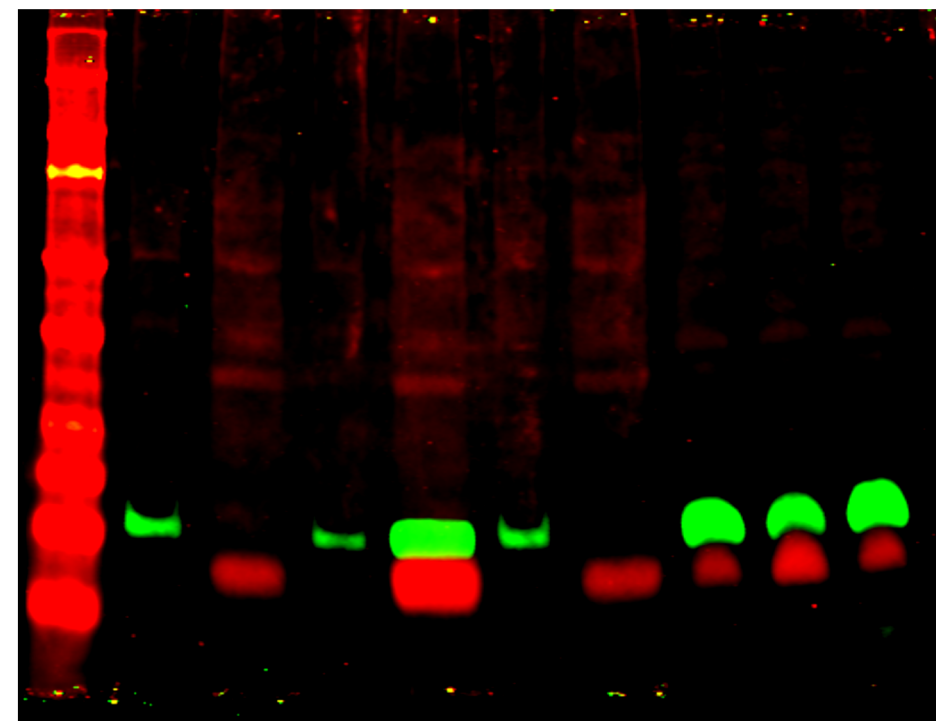

Supplement: supp [file Figure 3C source data.pdf › Source data/Gel images source data/Figure 3C source data.pdf]
