# Supplementary figures and images for: Divergent acyl carrier protein decouples mitochondrial Fe-S cluster biogenesis from fatty acid synthesis in malaria parasites
Source: eLife journal article supplement (doi:10.7554/elife.71636), 2021-10-06

Uncropped gel images for Figure 1- figure supplement 4.

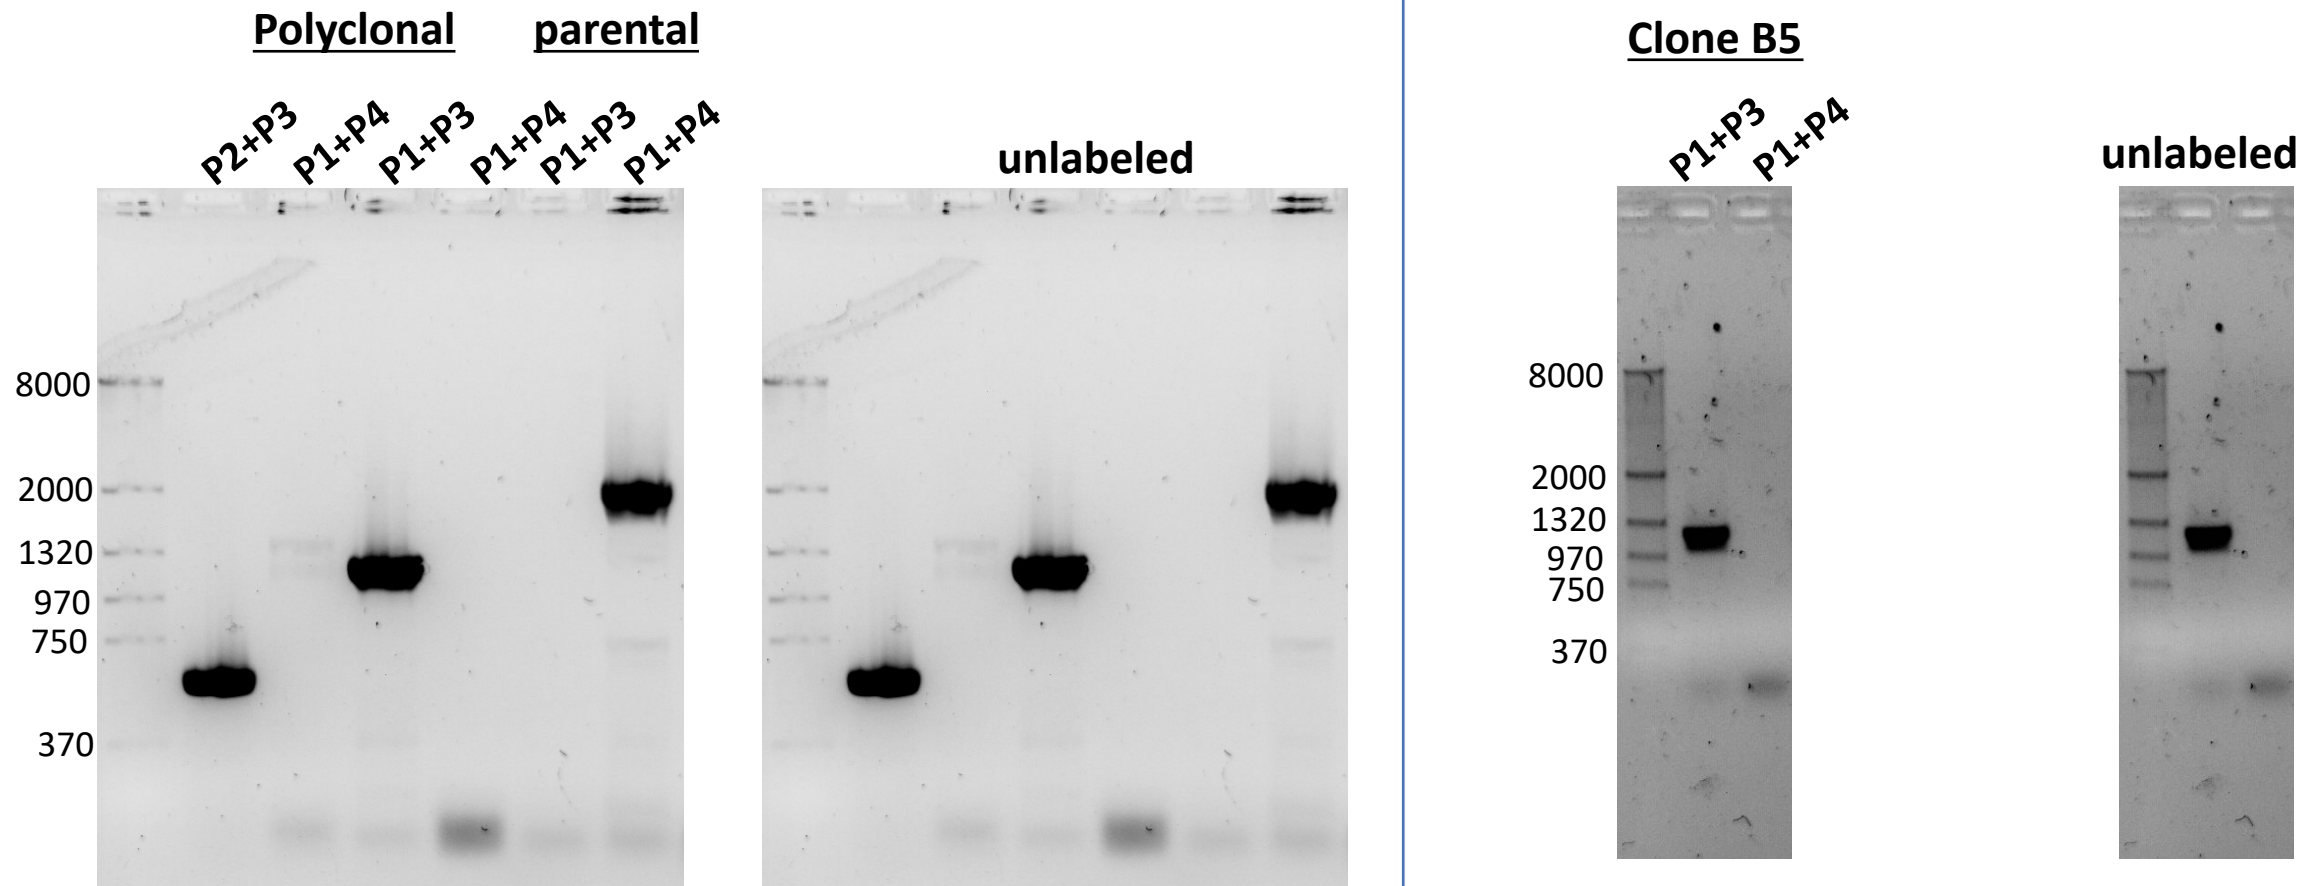

Supplement: supp [file Figure 1- figure supplement 4 source data.pdf › Source data/Gel images source data/Figure 1- figure supplement 4 source data.pdf]

Full Images for Figure 1C

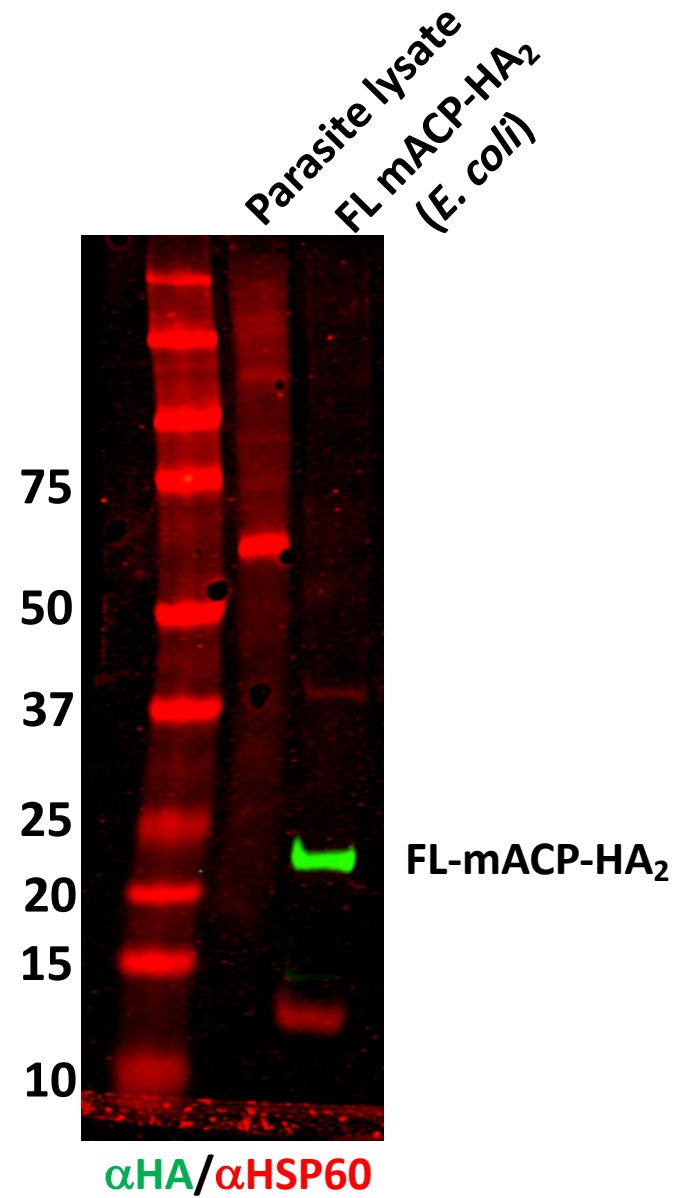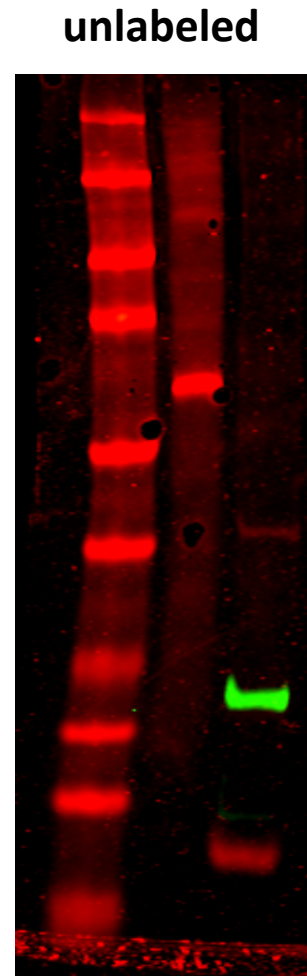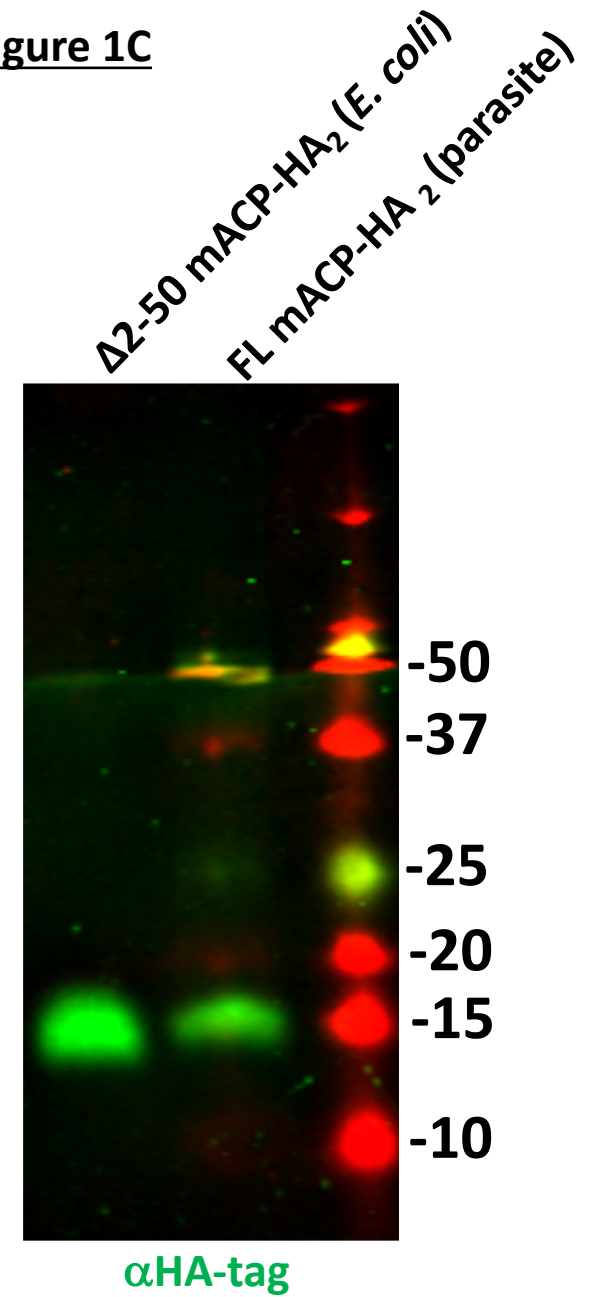

Supplement: supp [file Figure 1C source data.pdf › Source data/Gel images source data/Figure 1C source data.pdf]

## Full Images for Figure 1E

### Experiment 1

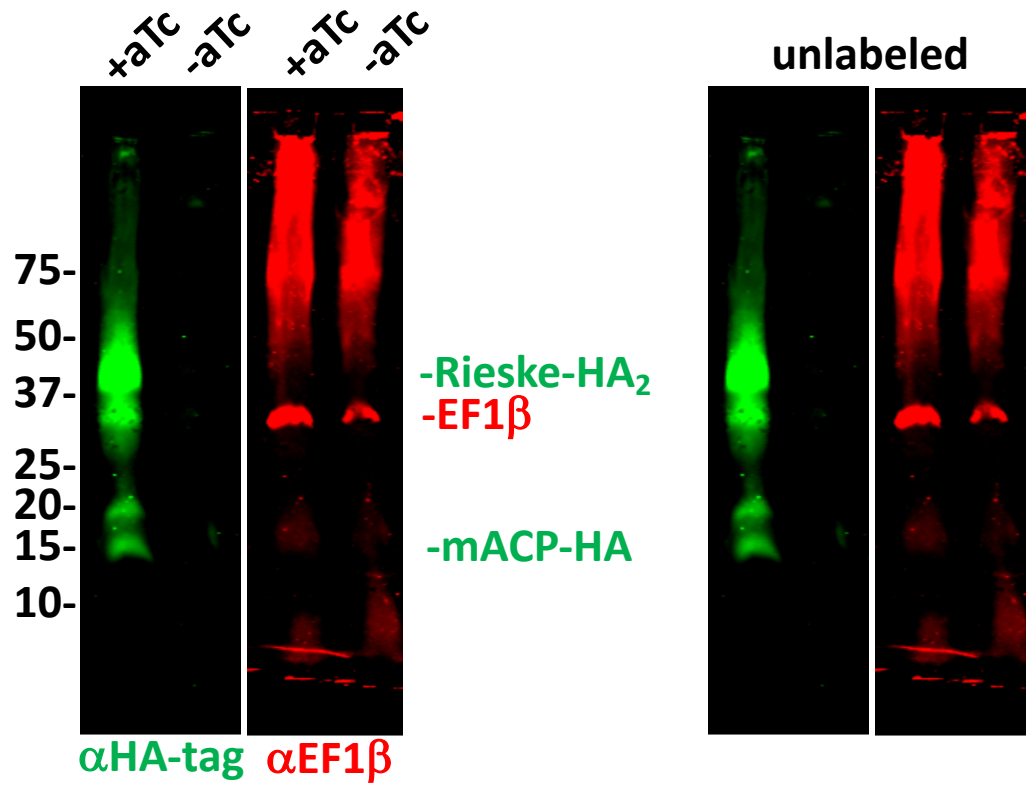

### Experiment 2

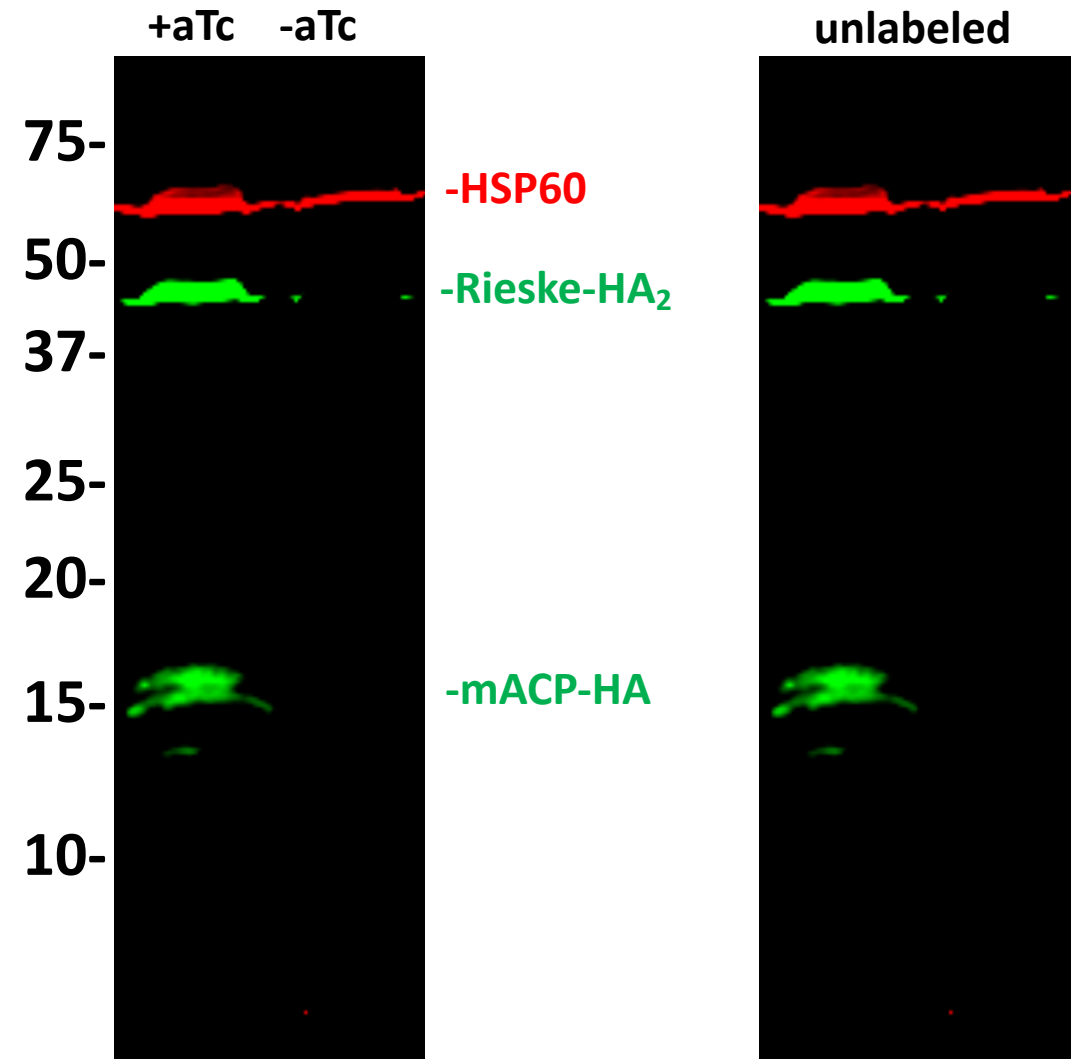

Supplement: supp [file Figure 1E source data.pdf › Source data/Gel images source data/Figure 1E source data.pdf]

Uncropped Image for Figure 2- figure supplement 4E

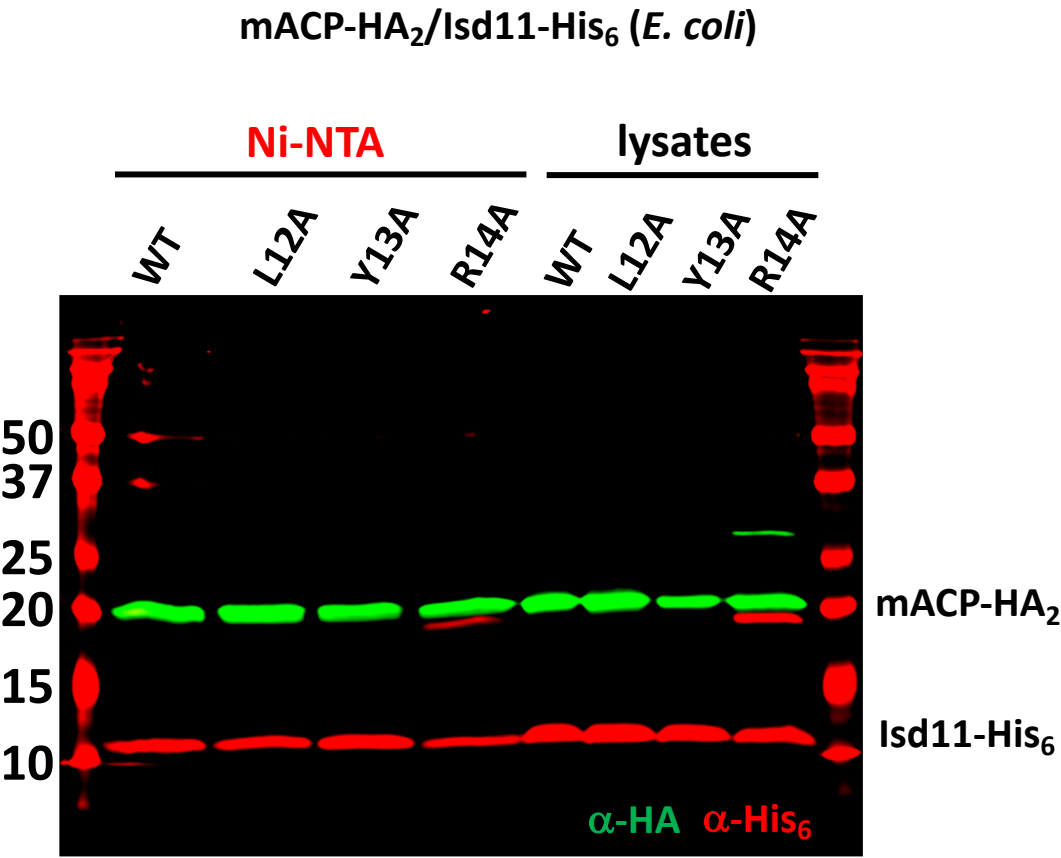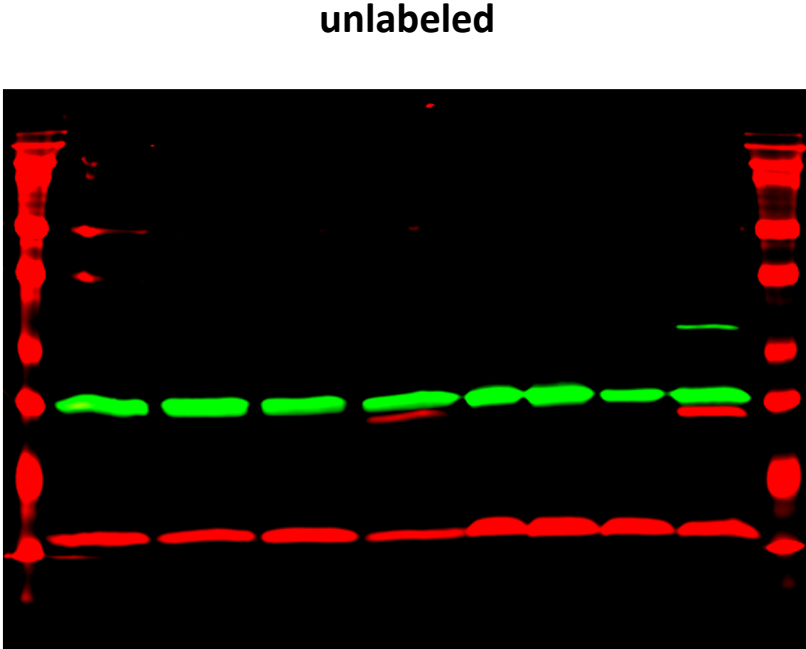

Supplement: supp [file Figure 2- figure supplement 4E source data .pdf › Source data/Gel images source data/Figure 2- figure supplement 4E source data .pdf]

Uncropped Image for Figure 2- figure supplement 7

$\Delta 2-40$  aACP-HA<sub>2</sub>/Isd11-His<sub>6</sub> (*E. coli*)

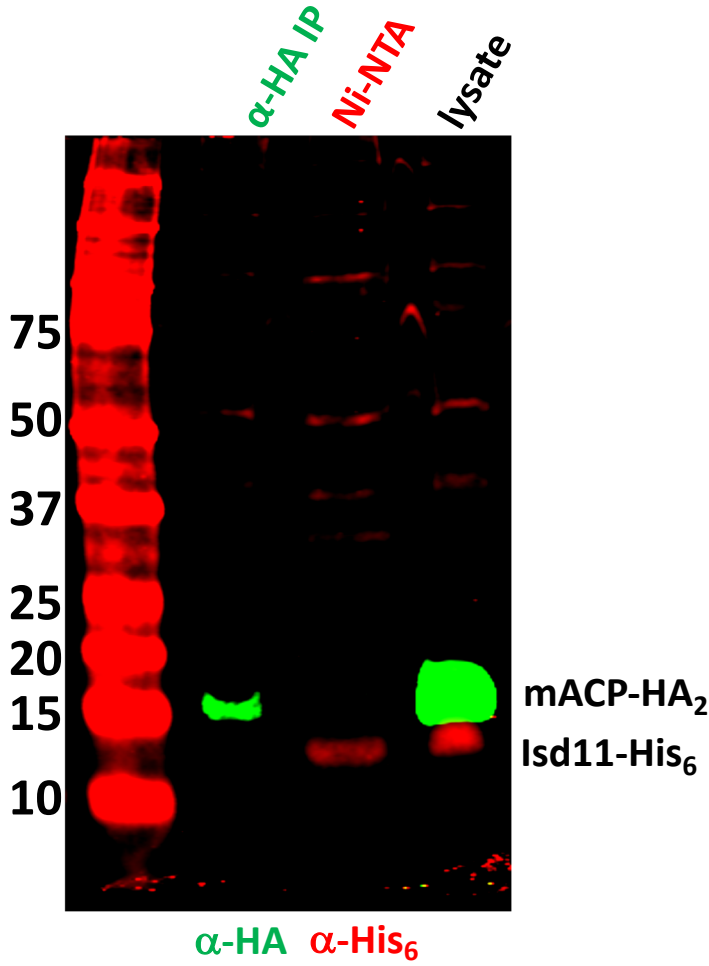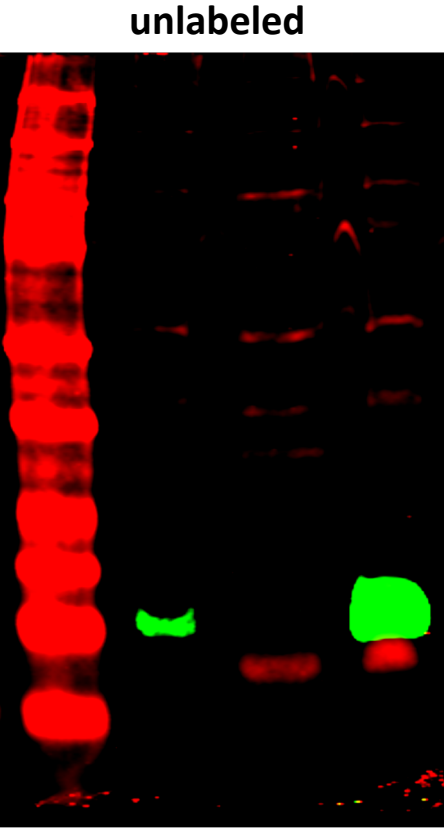

Supplement: supp [file Figure 2- figure supplement 7 source data.pdf › Source data/Gel images source data/Figure 2- figure supplement 7 source data.pdf]

Full Uncropped Images for Figure 2, D and E

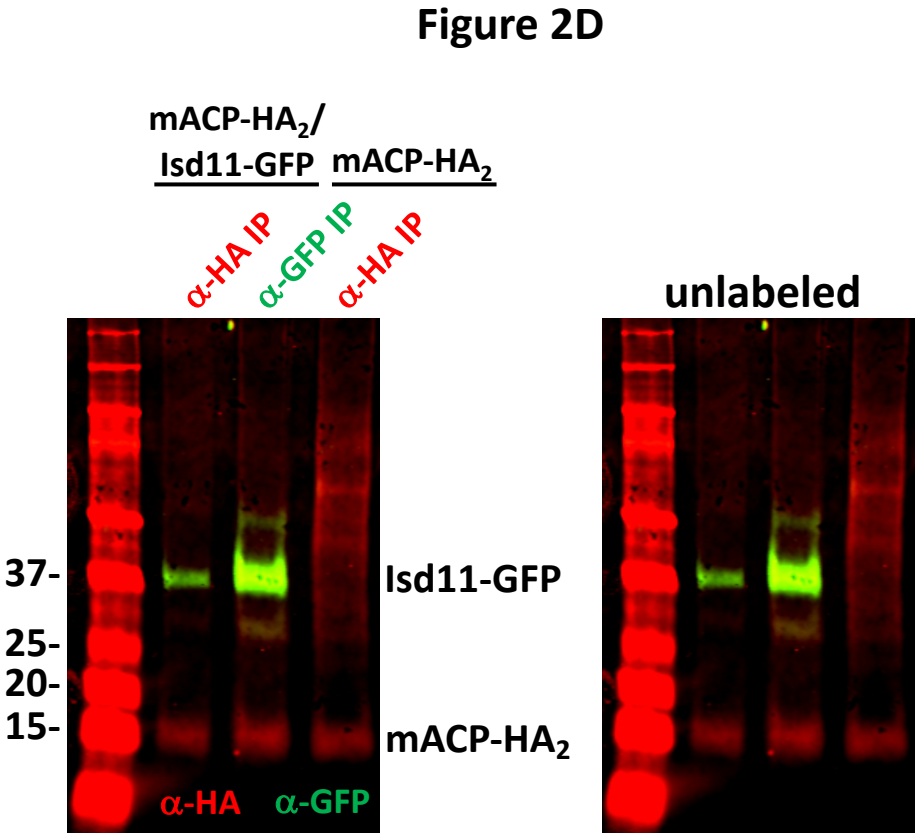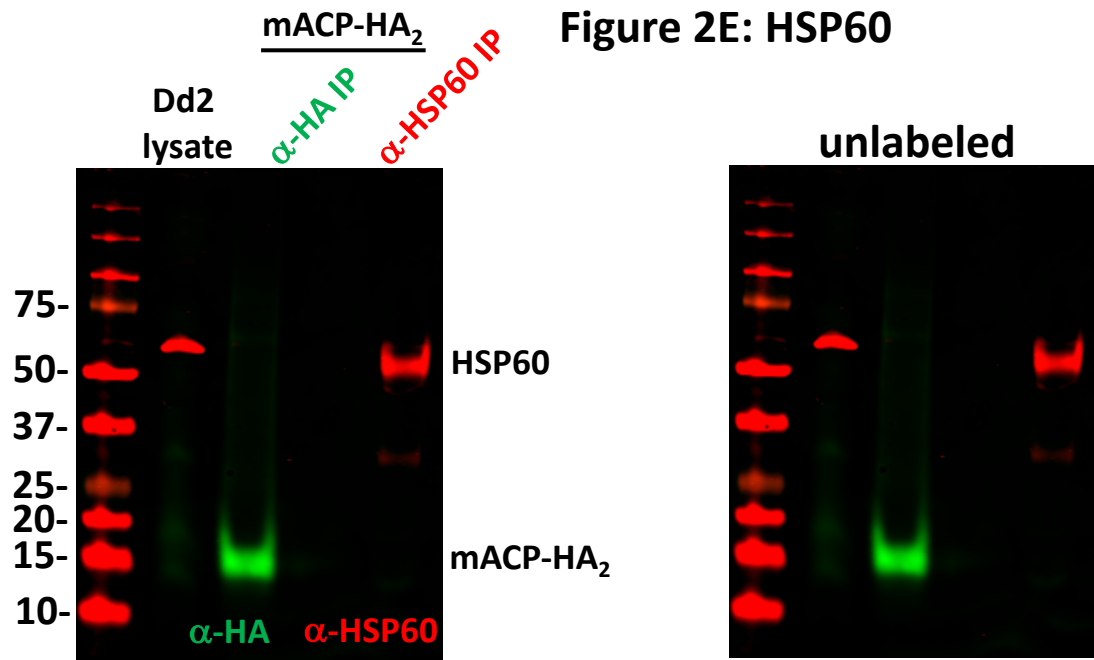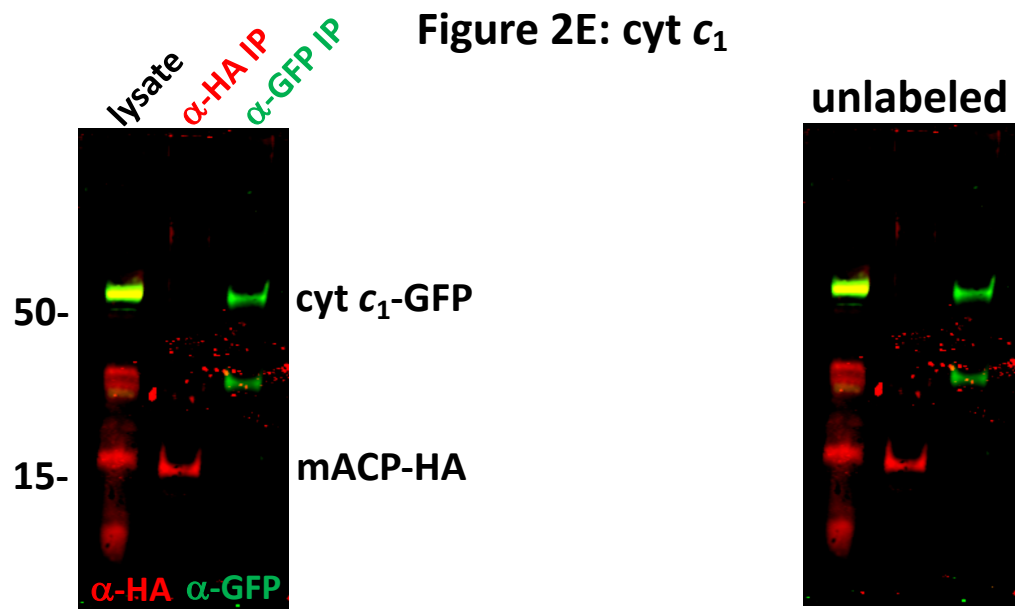

Supplement: supp [file Figure 2D,E- source data .pdf › Source data/Gel images source data/Figure 2D,E- source data .pdf]

# Full Uncropped Images for Figure 2, F and G

**Figure 2F**

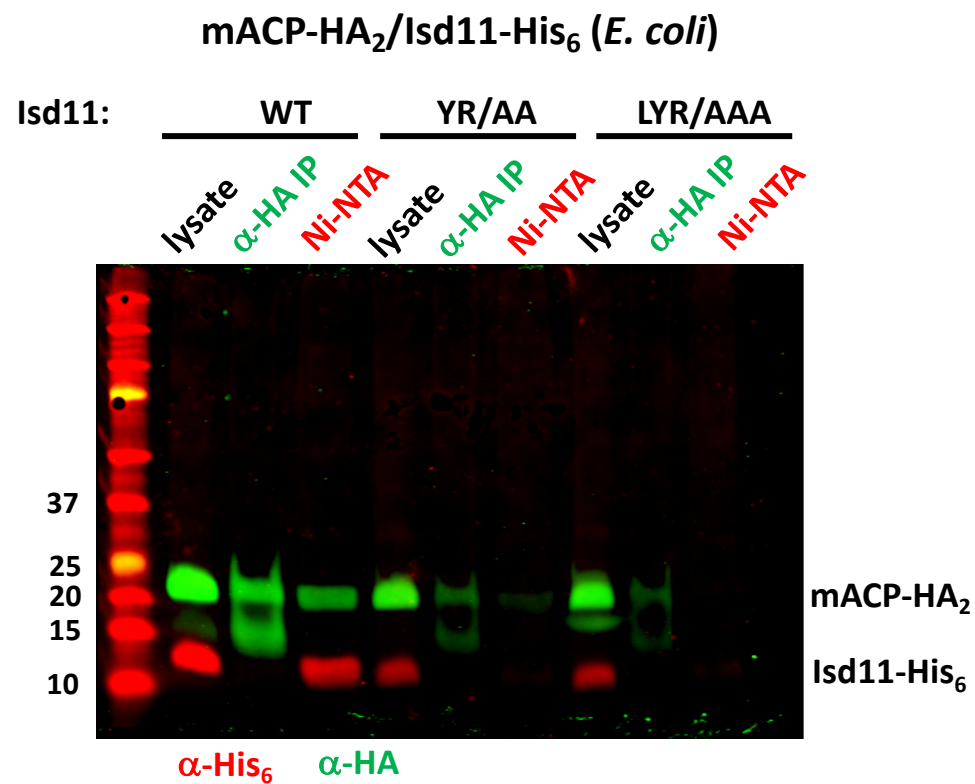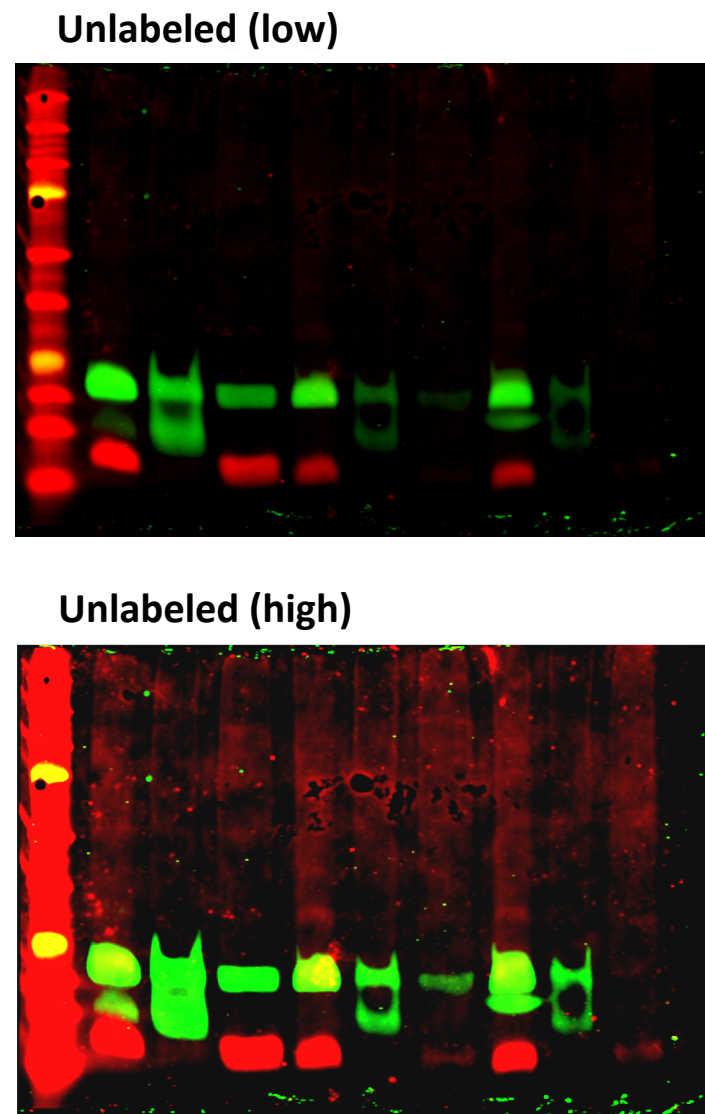

**Figure 2G**

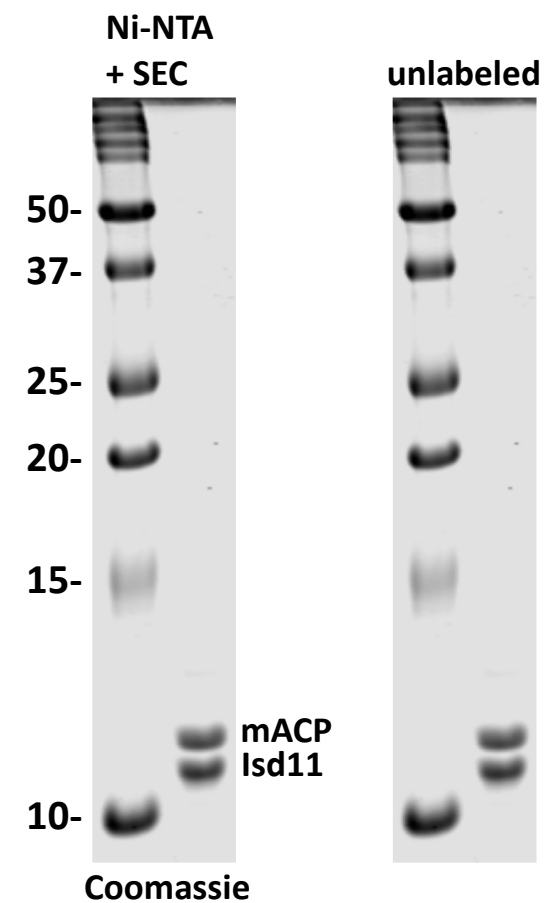

Supplement: supp [file Figure 2F,G- source data.pdf › Source data/Gel images source data/Figure 2F,G- source data.pdf]

Uncropped gel for Figure 4- figure supplement 1

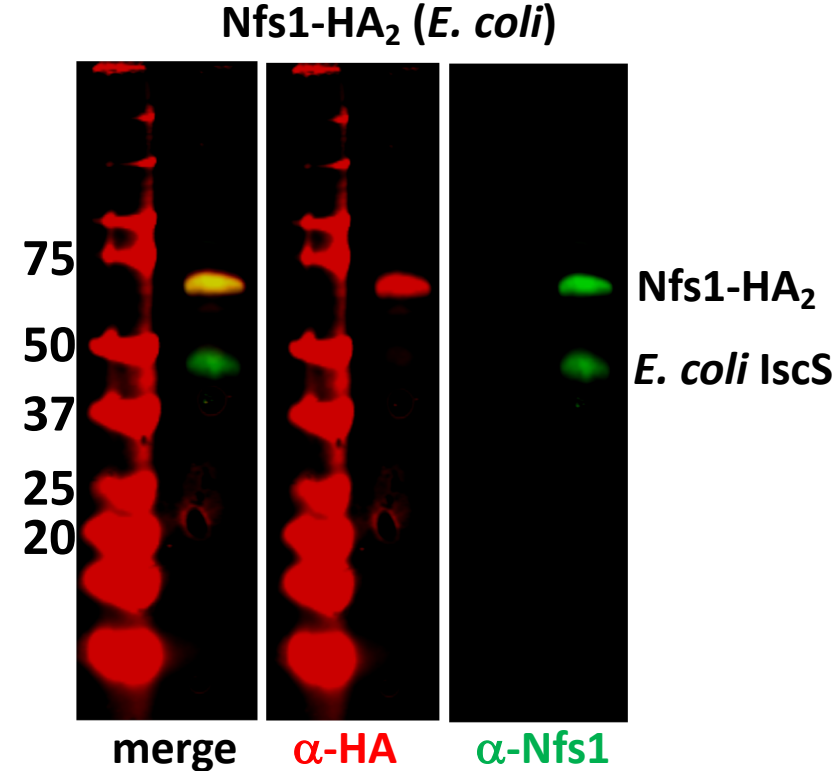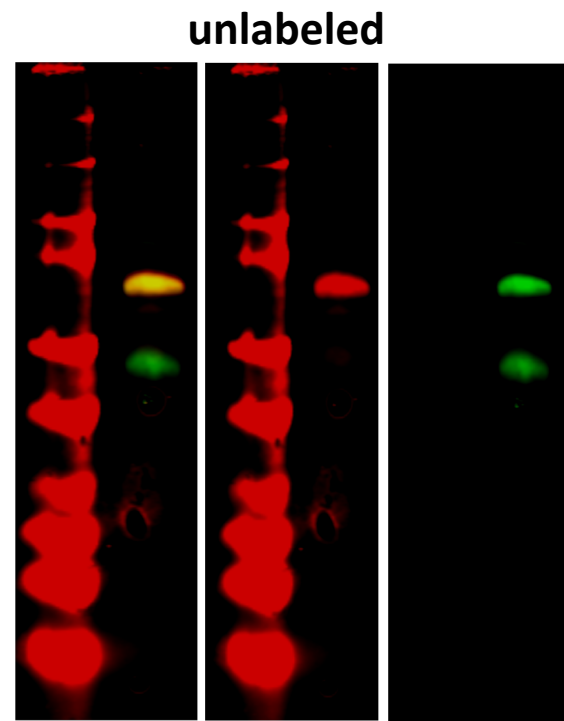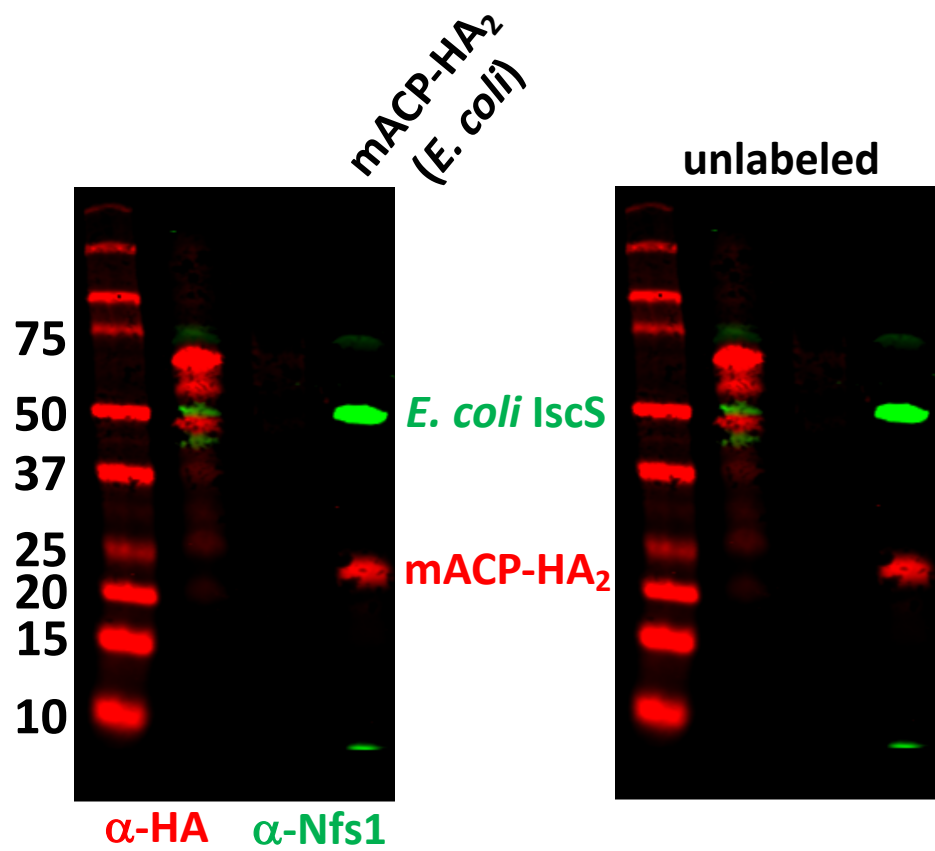

Supplement: supp [file Figure 4- figure supplement 1 source data.pdf › Source data/Gel images source data/Figure 4- figure supplement 1 source data.pdf]

Figure 4A Source Data

Experiment 1

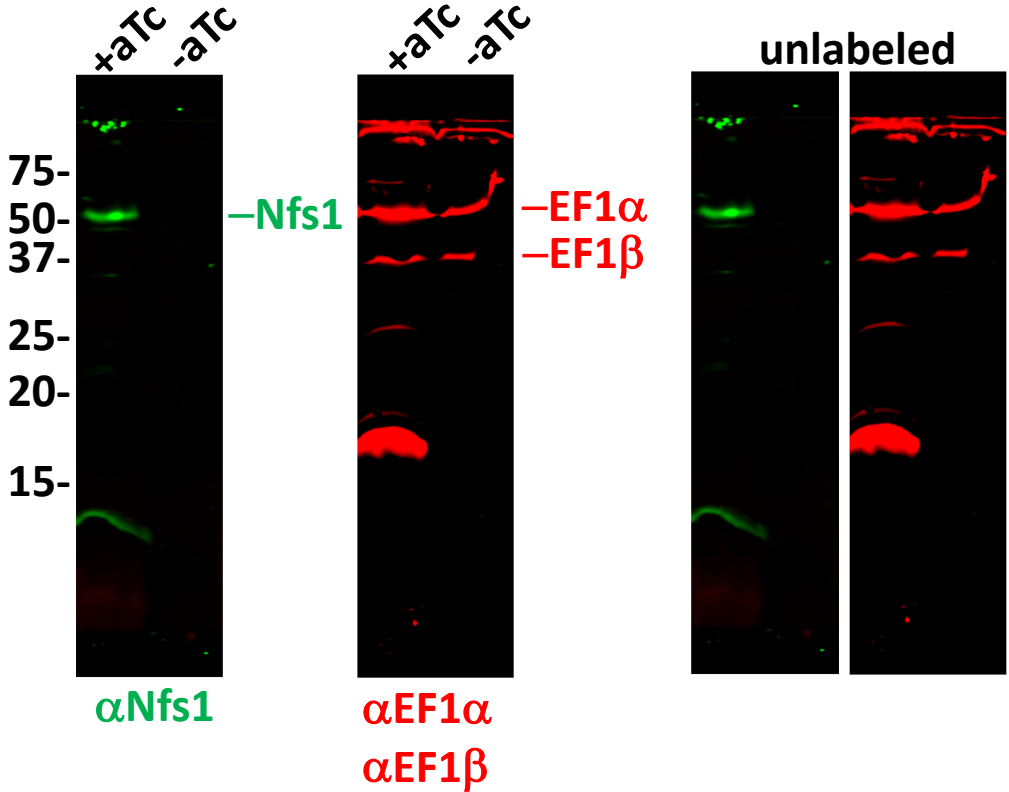

Experiment 2

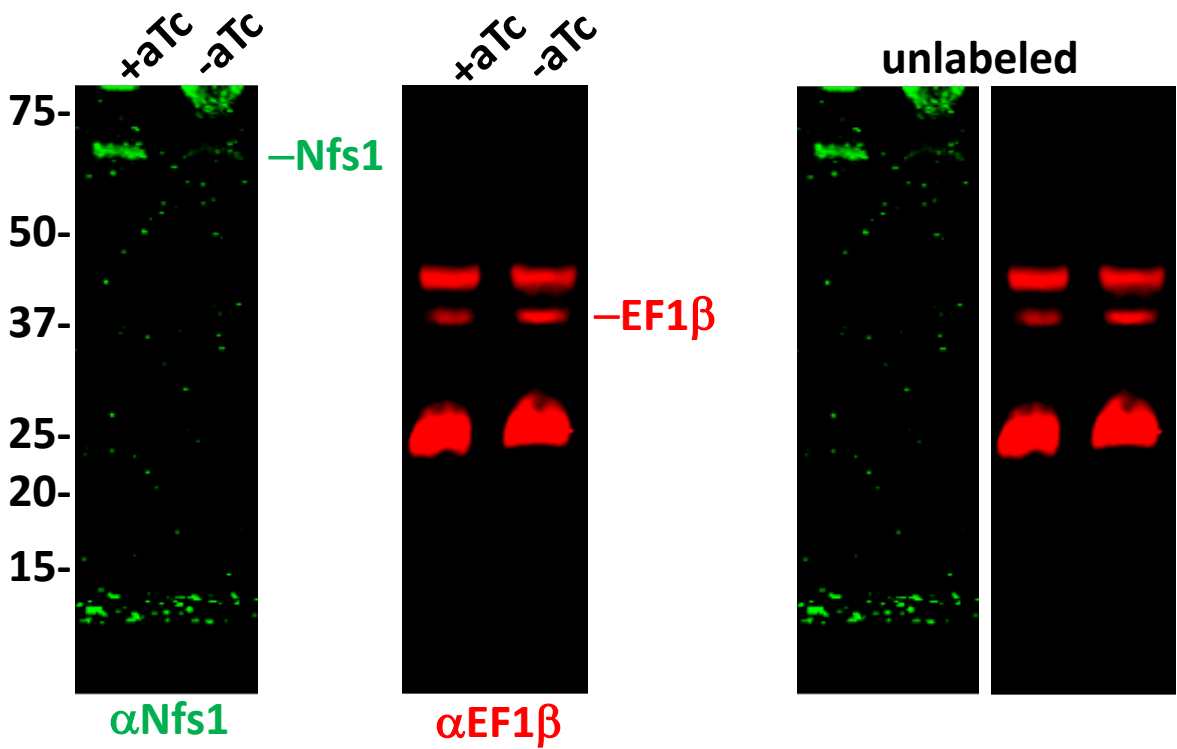

Supplement: supp [file Figure 4A source data.pdf › Source data/Gel images source data/Figure 4A source data.pdf]

Uncropped Images for Figure 4B

Experiment 1

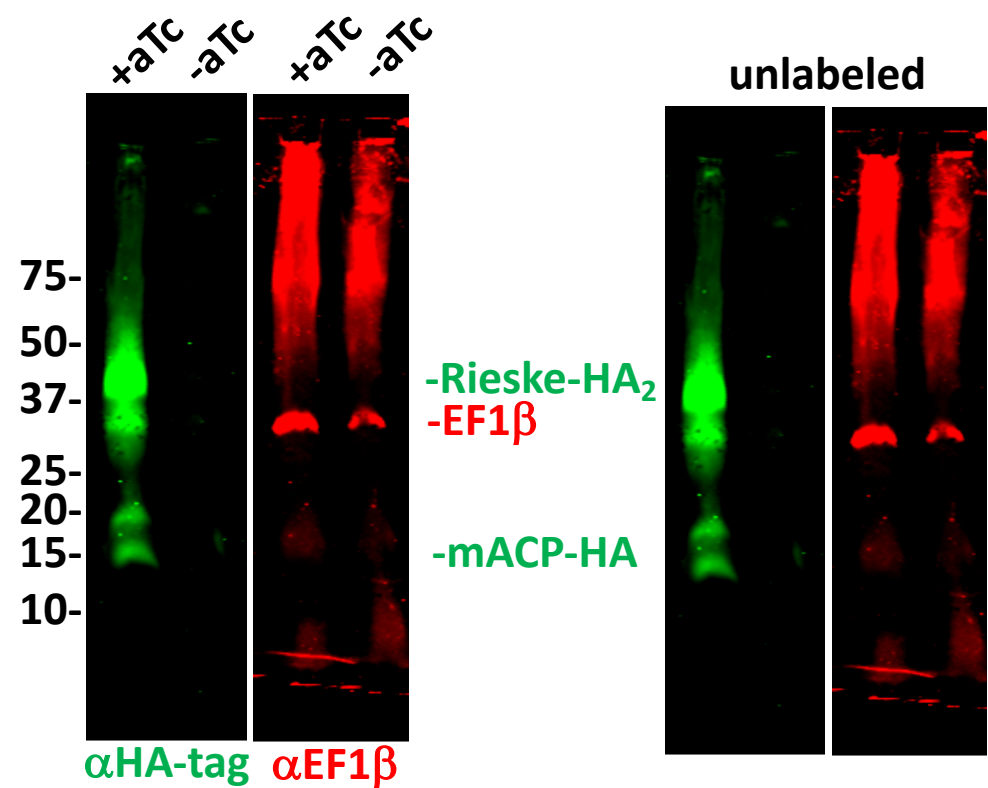

Experiment 2

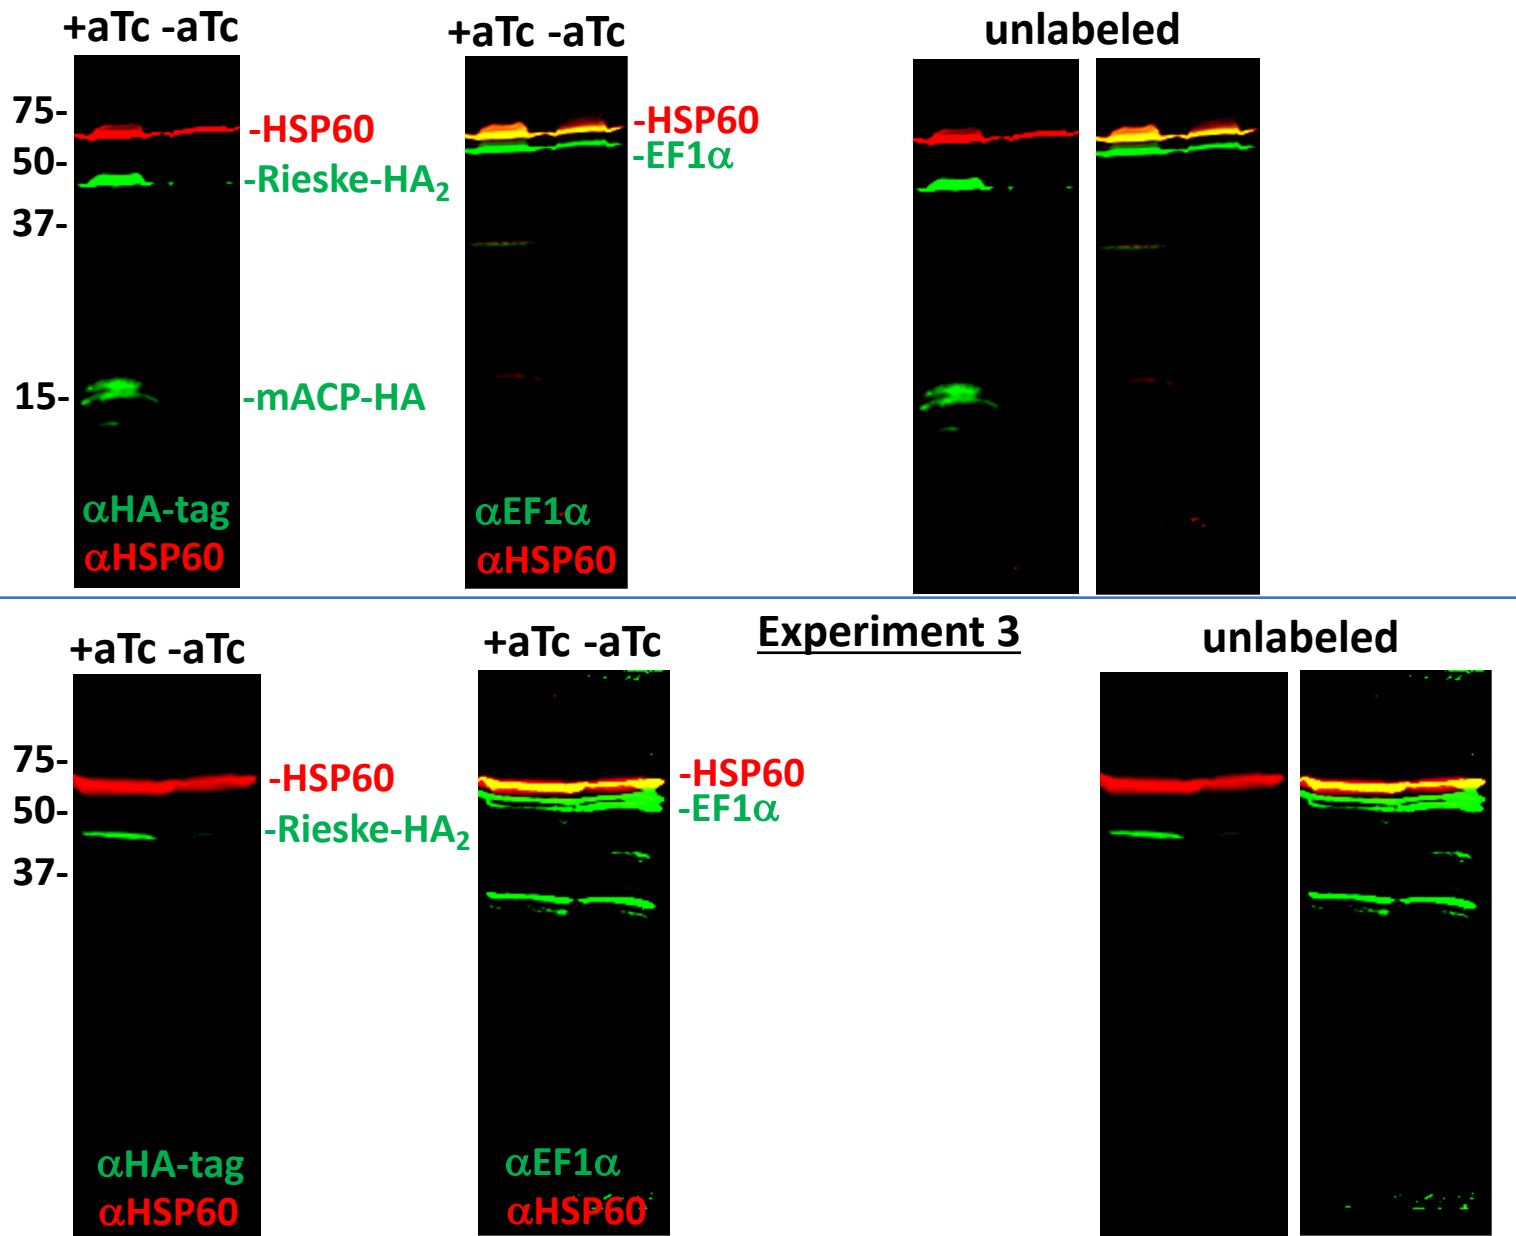

Supplement: supp [file Figure 4B source data.pdf › Source data/Gel images source data/Figure 4B source data.pdf]

Uncropped Images for Figure 4C

Experiment 1

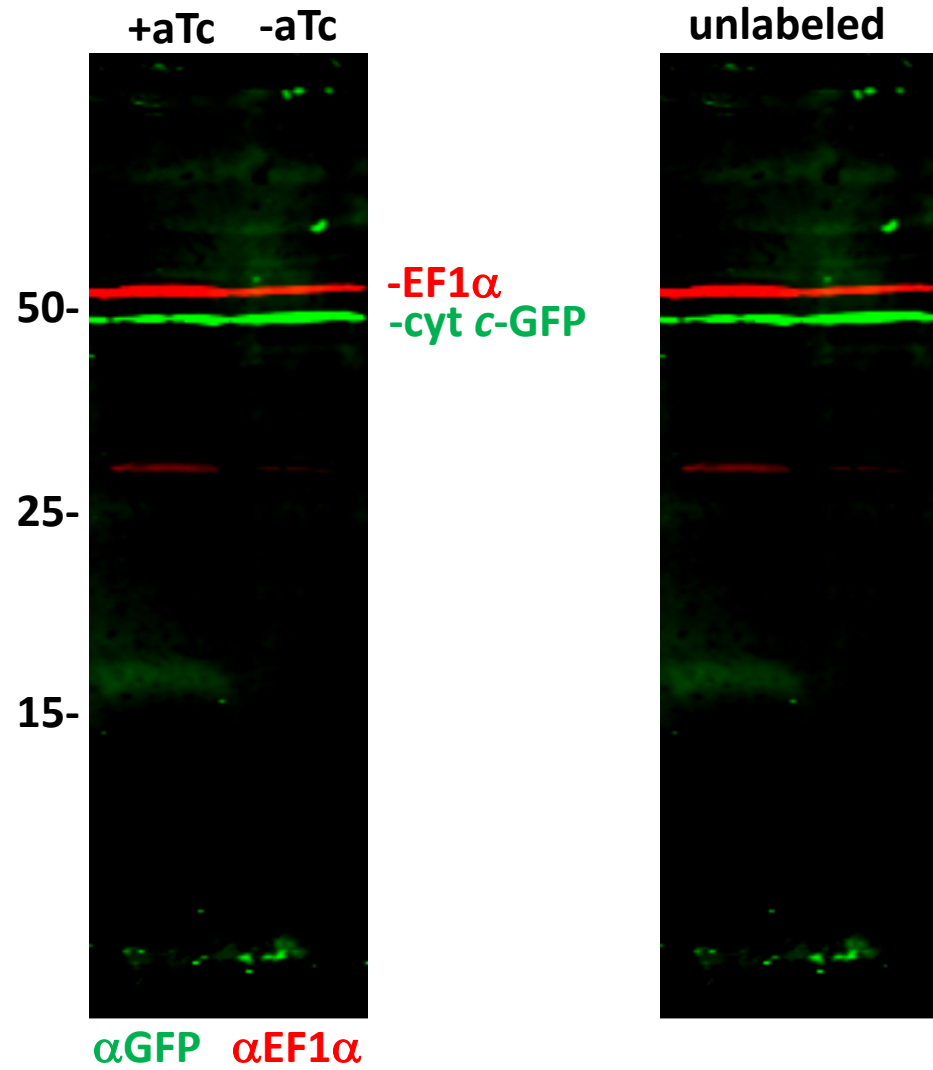

Experiment 2

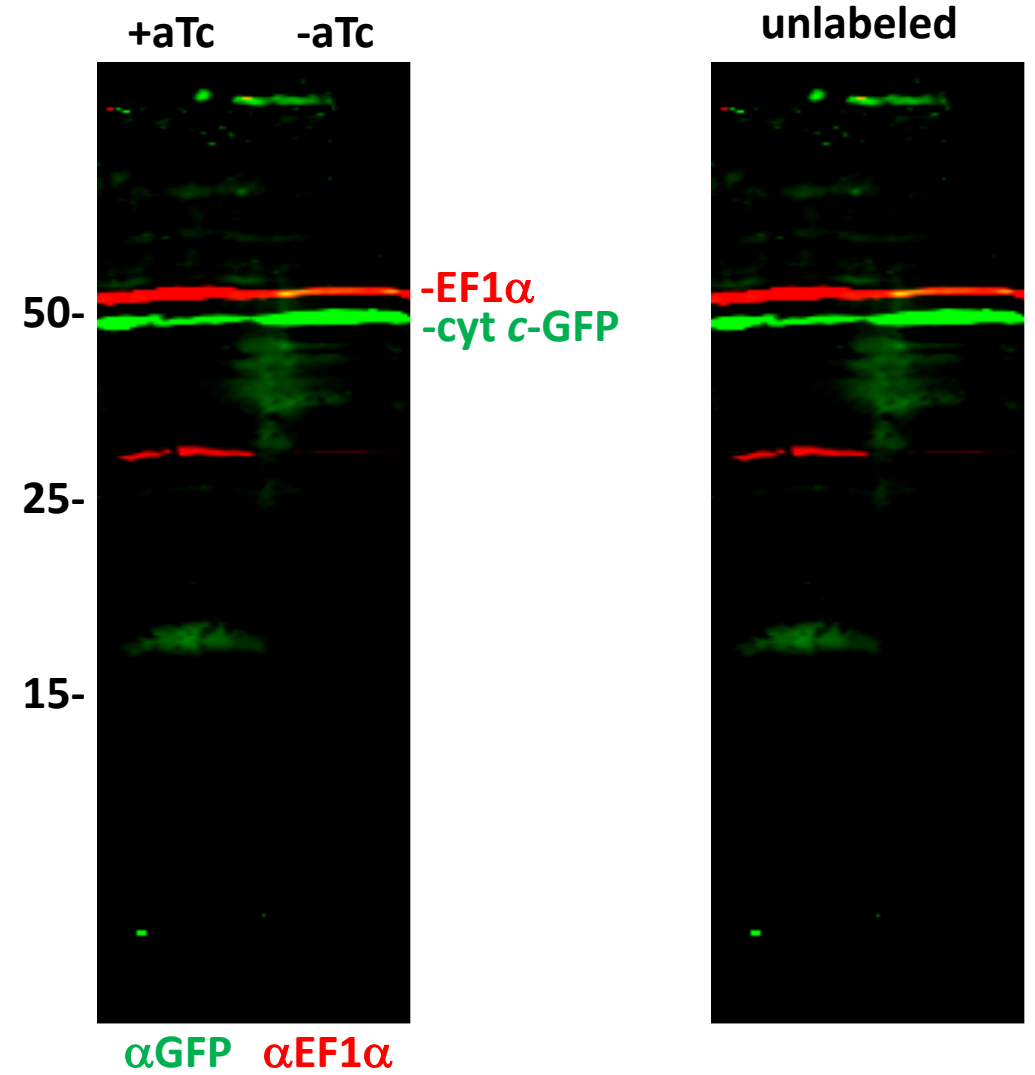

Supplement: supp [file Figure 4C source data.pdf › Source data/Gel images source data/Figure 4C source data.pdf]
